# Supplementary material
Source: PubMed Central journal article supplement (PMC7486265)
Supplement: NIHMS1608282-supplement-Major_Resources.pdf [file NIHMS1608282-supplement-Major_Resources.pdf]

## Major Resources Table

In order to allow validation and replication of experiments, all essential research materials listed in the Methods should be included in the Major Resources Table below. Authors are encouraged to use public repositories for protocols, data, code, and other materials and provide persistent identifiers and/or links to repositories when available. Authors may add or delete rows as needed.

### Animals (in vivo studies)

| Species                                                           | Vendor or Source  | Background Strain | Sex  | Persistent ID / URL                                                                                               |
|-------------------------------------------------------------------|-------------------|-------------------|------|-------------------------------------------------------------------------------------------------------------------|
| WT littermates                                                    | JAX stock #013198 | C57BL/6           | Male | <a href="https://www.jax.org/cn/search-intl?q=miR-223y%2F-">https://www.jax.org/cn/search-intl?q=miR-223y%2F-</a> |
| miR-223 <sup>y/-</sup>                                            | JAX stock #013198 | C57BL/6           | Male | <a href="https://www.jax.org/cn/search-intl?q=miR-223y%2F-">https://www.jax.org/cn/search-intl?q=miR-223y%2F-</a> |
| C57BL/6-Tg(PF4-icre)Q3Rsko/J                                      | JAX stock #008535 | C57BL/6           | M/F  | <a href="https://www.jax.org/cn/search-intl?q=pf4%2Fcre">https://www.jax.org/cn/search-intl?q=pf4%2Fcre</a>       |
| B6.129(Cg)-Gt(ROSA)26Sor <sup>tm4(ACTB-tdTomato,-EGFP)Luo/J</sup> | JAX stock #007676 | C57BL/6           | M/F  | <a href="https://www.jax.org/cn/search-intl?q=mtmg">https://www.jax.org/cn/search-intl?q=mtmg</a>                 |

### Genetically Modified Animals (PF4-cre: mT/mG mice)

|                 | Species                                                           | Vendor or Source  | Background Strain | Other Information | Persistent ID / URL                                                                                         |
|-----------------|-------------------------------------------------------------------|-------------------|-------------------|-------------------|-------------------------------------------------------------------------------------------------------------|
| Parent - Male   | C57BL/6-Tg(PF4-icre)Q3Rsko/J                                      | JAX stock #008535 | C57BL/6           | No. 008535        | <a href="https://www.jax.org/cn/search-intl?q=pf4%2Fcre">https://www.jax.org/cn/search-intl?q=pf4%2Fcre</a> |
| Parent - Female | B6.129(Cg)-Gt(ROSA)26Sor <sup>tm4(ACTB-tdTomato,-EGFP)Luo/J</sup> | JAX stock #007676 | C57BL/6           | No. 007676        | <a href="https://www.jax.org/cn/search-intl?q=mtmg">https://www.jax.org/cn/search-intl?q=mtmg</a>           |

### Antibodies

| Target antigen         | Vendor or Source | Catalog # | Working concentration | Lot # (preferred but not required) | Persistent ID / URL                                                                                                                                                 |
|------------------------|------------------|-----------|-----------------------|------------------------------------|---------------------------------------------------------------------------------------------------------------------------------------------------------------------|
| ACTA2                  | Abcam            | ab119952  | 1:1000                | NA                                 | <a href="https://www.abcam.com/alpha-smooth-muscle-actin-antibody-4a4-ab119952.html">https://www.abcam.com/alpha-smooth-muscle-actin-antibody-4a4-ab119952.html</a> |
| CNN1                   | Abcam            | ab46794   | 1:1000                | NA                                 | <a href="https://www.abcam.com/calponin-1-antibody-ep798y-ab46794.html">https://www.abcam.com/calponin-1-antibody-ep798y-ab46794.html</a>                           |
| TAGLN                  | Abcam            | ab170902  | 1:1000                | NA                                 | <a href="https://www.abcam.com/taglntransgelin-antibody-epr11995b-ab170902.html">https://www.abcam.com/taglntransgelin-antibody-epr11995b-ab170902.html</a>         |
| OPN                    | Abcam            | ab166709  | 1:1000                | NA                                 | <a href="https://www.abcam.com/osteopontin-antibody-7c5h12-ab166709.html">https://www.abcam.com/osteopontin-antibody-7c5h12-ab166709.html</a>                       |
| PCNA                   | Abcam            | ab29      | 1:1000                | NA                                 | <a href="https://www.abcam.com/pcna-antibody-pc10-ab29.html">https://www.abcam.com/pcna-antibody-pc10-ab29.html</a>                                                 |
| PDGFR $\beta$ (for WB) | Abcam            | ab32570   | 1:1000                | NA                                 | <a href="https://www.abcam.com/pdgfr-beta-antibody-y92-c-terminal-ab32570.html">https://www.abcam.com/pdgfr-beta-antibody-y92-c-terminal-ab32570.html</a>           |
| $\alpha$ -tubulin      | Abcam            | ab52866   | 1:3000                | NA                                 | <a href="https://www.abcam.com/products?keywords=tubulin+52866">https://www.abcam.com/products?keywords=tubulin+52866</a>                                           |

|                                       |                |           |        |    |                                                                                                                                                                                                                                                                                                                                                                                                                         |
|---------------------------------------|----------------|-----------|--------|----|-------------------------------------------------------------------------------------------------------------------------------------------------------------------------------------------------------------------------------------------------------------------------------------------------------------------------------------------------------------------------------------------------------------------------|
| $\alpha$ -Actinin                     | Abcam          | ab18061   | 1:3000 | NA | <a href="https://www.abcam.com/products?keywords=alpha+Actinin+18061">https://www.abcam.com/products?keywords=alpha+Actinin+18061</a>                                                                                                                                                                                                                                                                                   |
| PDGFR $\beta$ (for IF)                | Santa Cruz     | sc-374573 | 1:50   | NA | <a href="https://www.scbt.com/zh/p/pdgfr-beta-antibody-d-6">https://www.scbt.com/zh/p/pdgfr-beta-antibody-d-6</a>                                                                                                                                                                                                                                                                                                       |
| CD45                                  | Abcam          | ab 23910  | 1:100  | NA | <a href="https://www.abcam.com/pdgfr-beta-antibody-y92-c-terminal-ab32570.html">https://www.abcam.com/pdgfr-beta-antibody-y92-c-terminal-ab32570.html</a>                                                                                                                                                                                                                                                               |
| smoothelin                            | Santa cruz     | sc-376902 | 1:100  | NA | <a href="https://www.scbt.com/p/smoothelin-antibody-c-8?requestFrom=search">https://www.scbt.com/p/smoothelin-antibody-c-8?requestFrom=search</a>                                                                                                                                                                                                                                                                       |
| FITC anti-mouse CD41                  | Biolegend      | 133903    | 1:100  | NA | <a href="https://www.biolegend.com/en-us/products/fitc-anti-mouse-cd41-antibody-5896">https://www.biolegend.com/en-us/products/fitc-anti-mouse-cd41-antibody-5896</a>                                                                                                                                                                                                                                                   |
| MMP9                                  | Abcam          | ab38898   | 1:100  | NA | <a href="https://www.abcam.com/mmp9-antibody-ab38898.html">https://www.abcam.com/mmp9-antibody-ab38898.html</a>                                                                                                                                                                                                                                                                                                         |
| Cleaved Caspase-3                     | Cell signaling | 9579S     | 1:250  | NA | <a href="https://www.cellsignal.com/products/primary-antibodies/cleaved-caspase-3-asp175-d3e9-rabbit-mab/9579?site-search-type=Products&amp;N=4294956287&amp;Ntt=9579s&amp;fromPage=plp&amp;requestid=2929027">https://www.cellsignal.com/products/primary-antibodies/cleaved-caspase-3-asp175-d3e9-rabbit-mab/9579?site-search-type=Products&amp;N=4294956287&amp;Ntt=9579s&amp;fromPage=plp&amp;requestid=2929027</a> |
| Alexa Fluor 594-conjugated anti-ACTA2 | Abcam          | ab202510  | 1:200  | NA | <a href="https://www.abcam.com/alpha-smooth-muscle-actin-antibody-epr5368-alexa-fluor-594-ab202510.html">https://www.abcam.com/alpha-smooth-muscle-actin-antibody-epr5368-alexa-fluor-594-ab202510.html</a>                                                                                                                                                                                                             |

#### DNA/cDNA Clones

| Clone Name | Sequence | Source / Repository | Persistent ID / URL |
|------------|----------|---------------------|---------------------|
| N/A        |          |                     |                     |

#### Cultured Cells

| Name   | Vendor or Source  | Sex (F, M, or unknown) | Persistent ID / URL                                                                                                                                                               |
|--------|-------------------|------------------------|-----------------------------------------------------------------------------------------------------------------------------------------------------------------------------------|
| HCASMC | Cell Applications | unknown                | <a href="https://www.cellapplications.com/human-coronary-artery-smooth-muscle-cells-hcasmc">https://www.cellapplications.com/human-coronary-artery-smooth-muscle-cells-hcasmc</a> |

#### Data & Code Availability

| Description                                                                                | Source / Repository | Persistent ID / URL                                                                                                                                                                             |
|--------------------------------------------------------------------------------------------|---------------------|-------------------------------------------------------------------------------------------------------------------------------------------------------------------------------------------------|
| miRNA sequencing of platelets from patients with kawasaki disease(KD) and healthy controls | NCBI database       | <a href="https://dataview.ncbi.nlm.nih.gov/object/PRJNA576349?reviewer=p6vck51k19t8fa37om7rh48ldo">https://dataview.ncbi.nlm.nih.gov/object/PRJNA576349?reviewer=p6vck51k19t8fa37om7rh48ldo</a> |

#### Other

| Description | Source / Repository | Persistent ID / URL |
|-------------|---------------------|---------------------|
| N/A         |                     |                     |
