# Supplementary material
Source: PubMed Central journal article supplement (PMC7486265)
Supplement: NIHMS1608282-supplement-Unedited_Gels.pdf [file NIHMS1608282-supplement-Unedited_Gels.pdf]

Full uncut gels

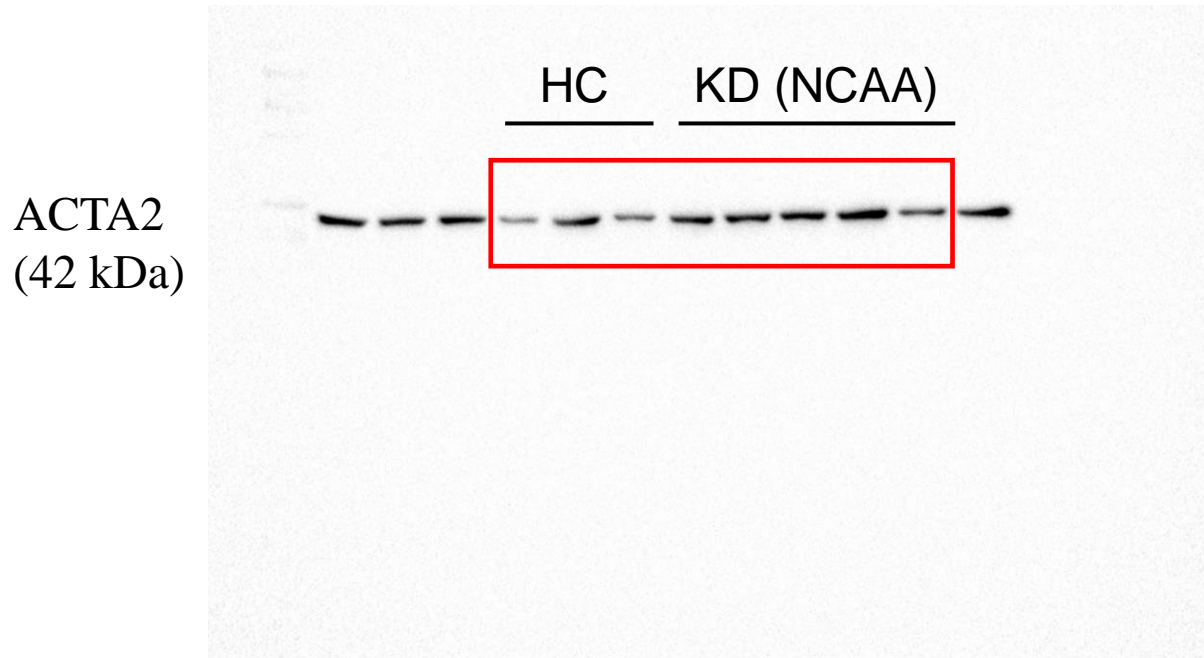

Full unedited gel for Figure4C  
Acquired with ChemiDoc (BioRad)

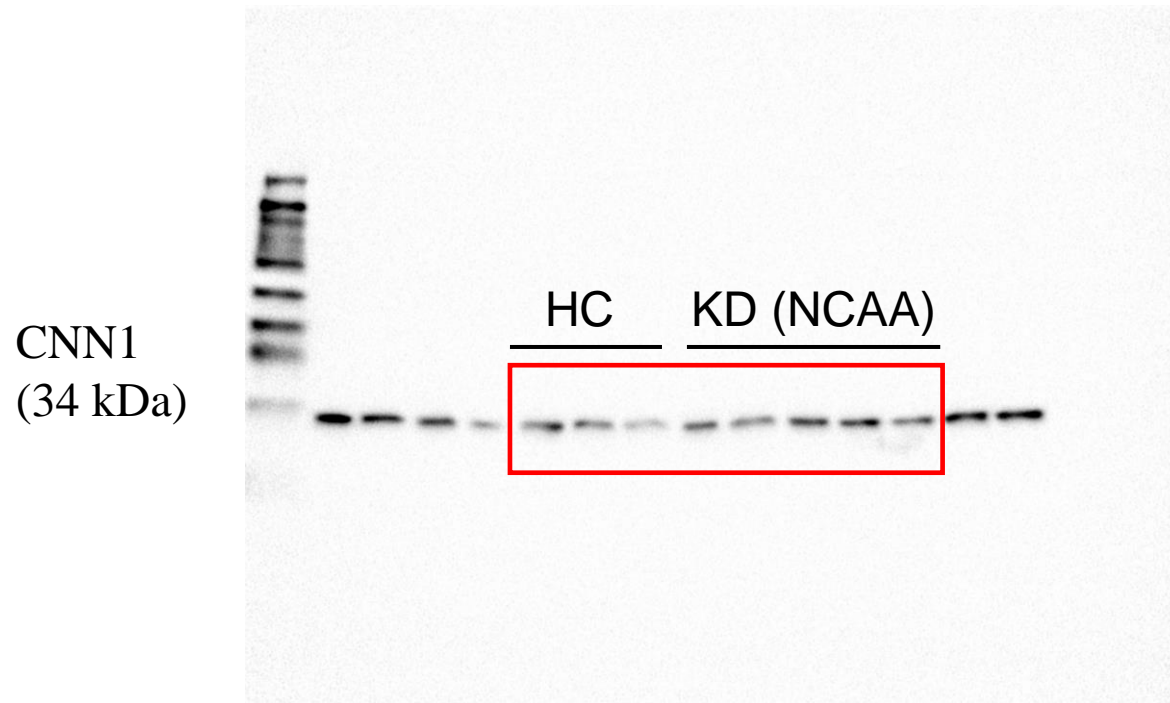

Full unedited gel for Figure4C  
Acquired with ChemiDoc (BioRad)

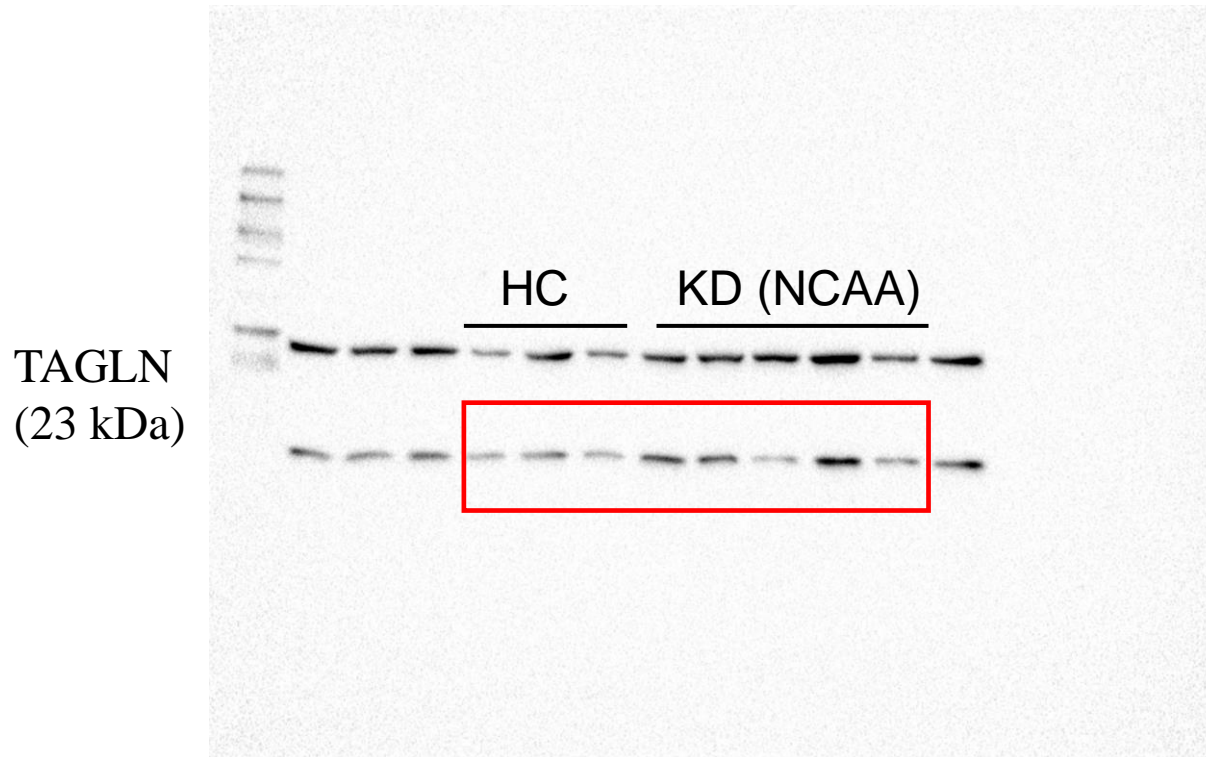

Full unedited gel for Figure4C  
Acquired with ChemiDoc (BioRad)

PCNA  
(29 kDa)

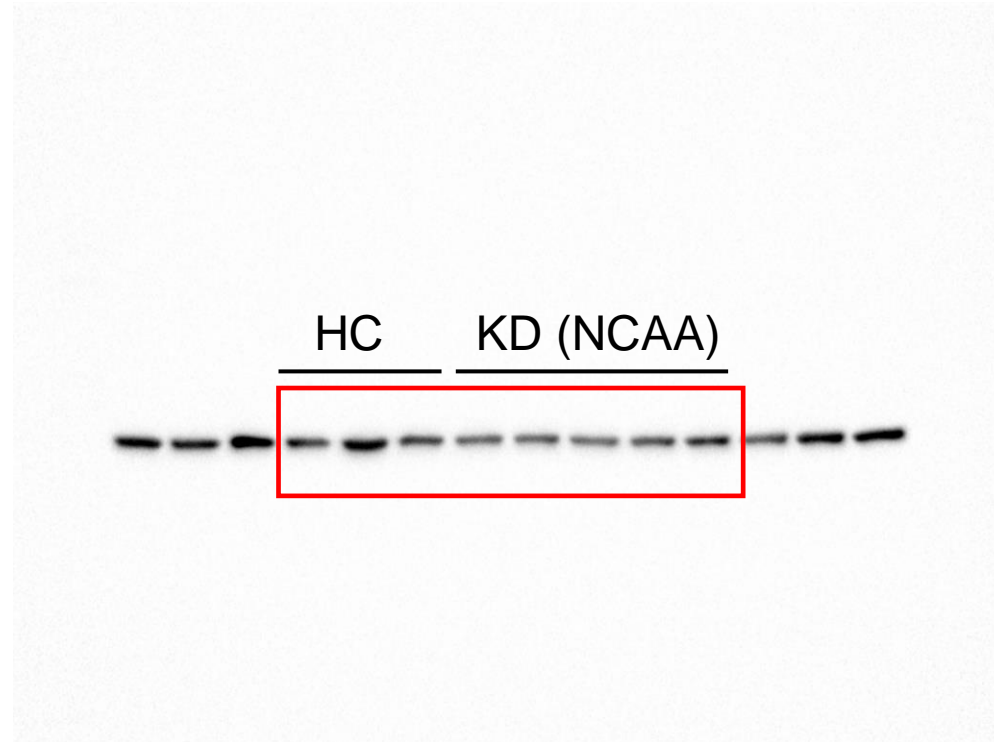

Full unedited gel for Figure4C  
Acquired with ChemiDoc (BioRad)

OPN  
(37 kDa)

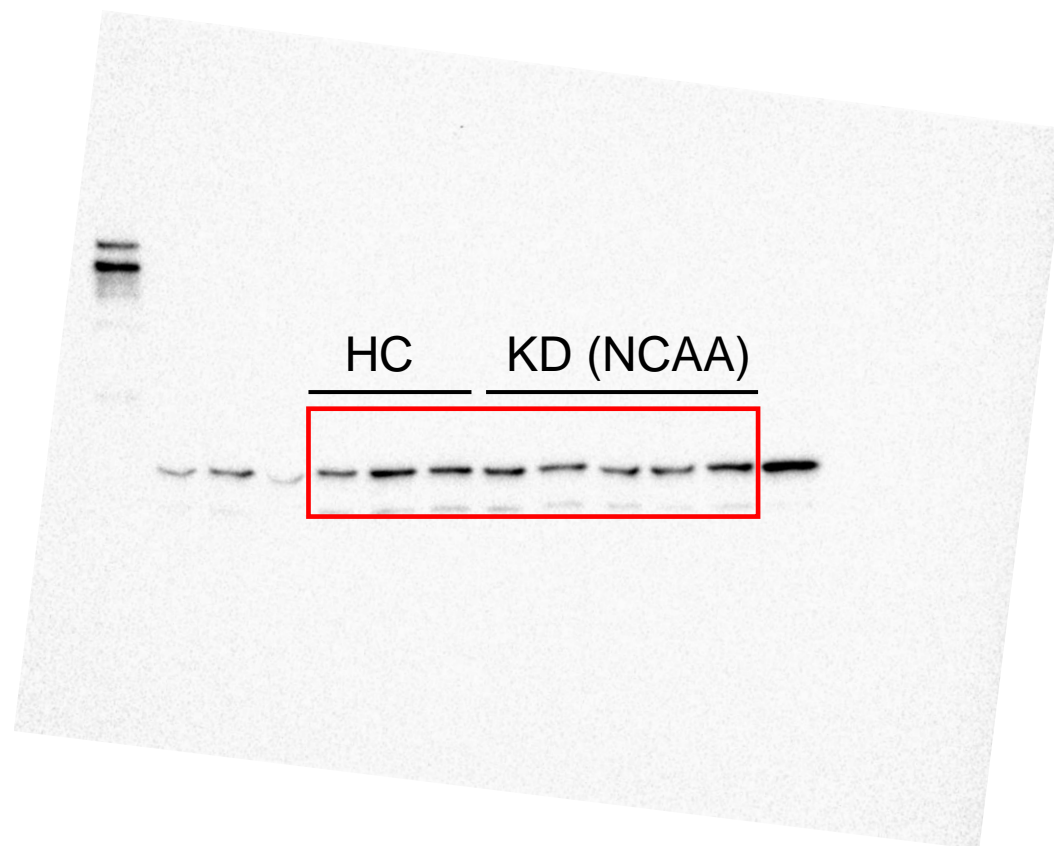

Full unedited gel for Figure4C  
Acquired with ChemiDoc (BioRad)

PDGFR $\beta$   
(124 kDa)

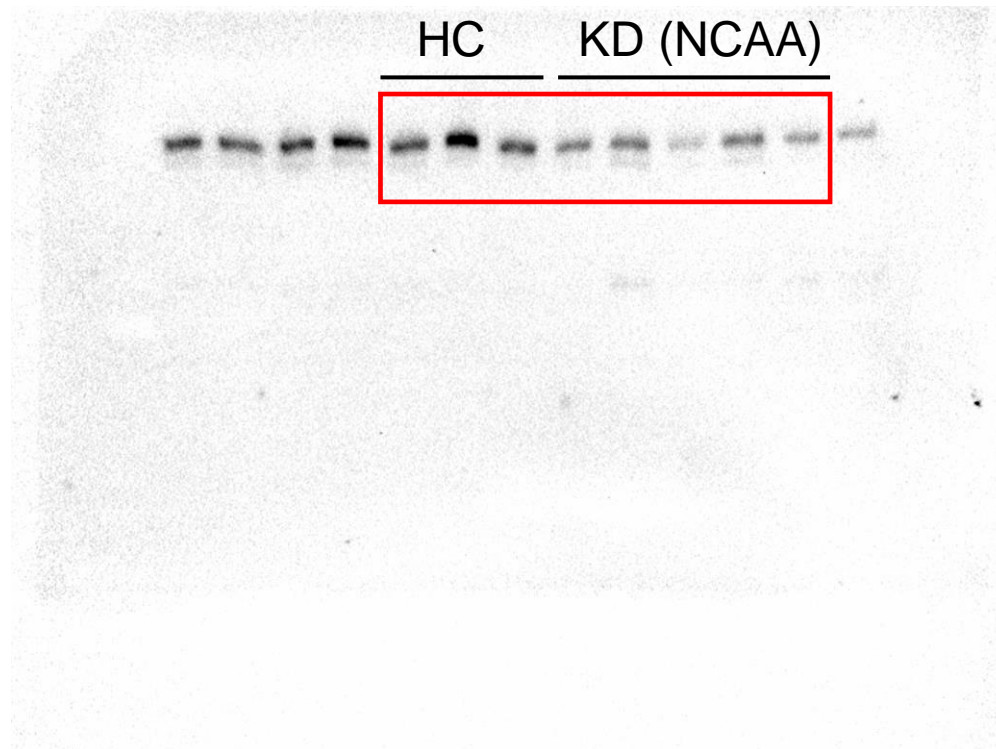

Full unedited gel for Figure4C  
Acquired with ChemiDoc (BioRad)

$\alpha$ -Tubulin  
(52 kDa)

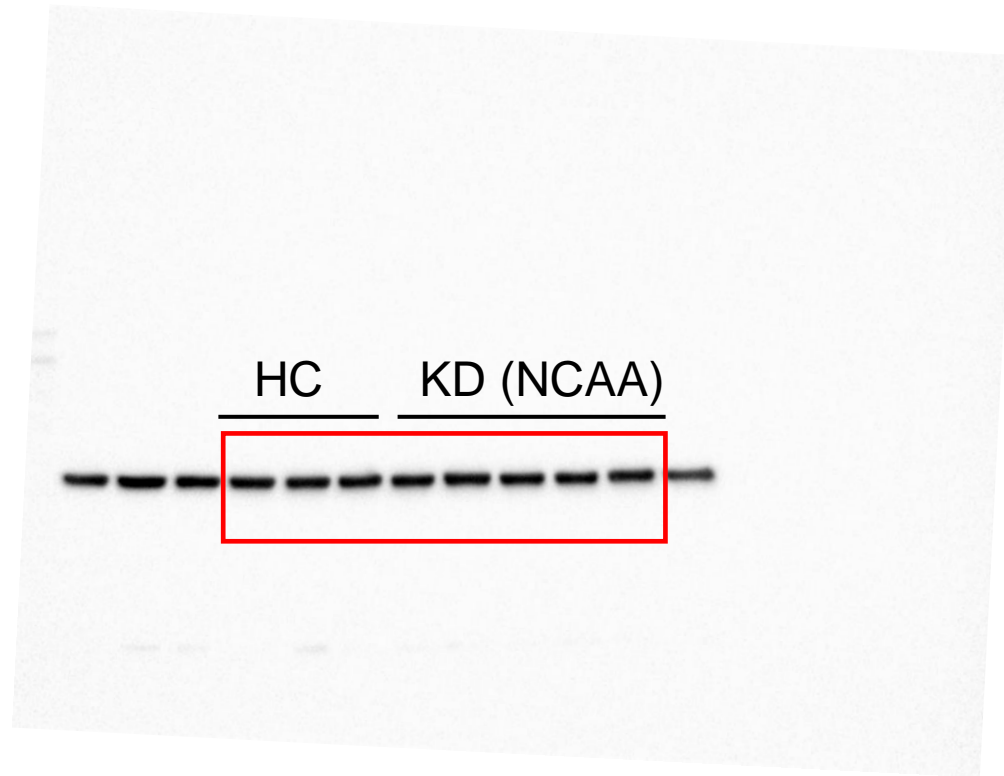

Full unedited gel for Figure4C  
Acquired with ChemiDoc (BioRad)



ACTA2  
(42 kDa)

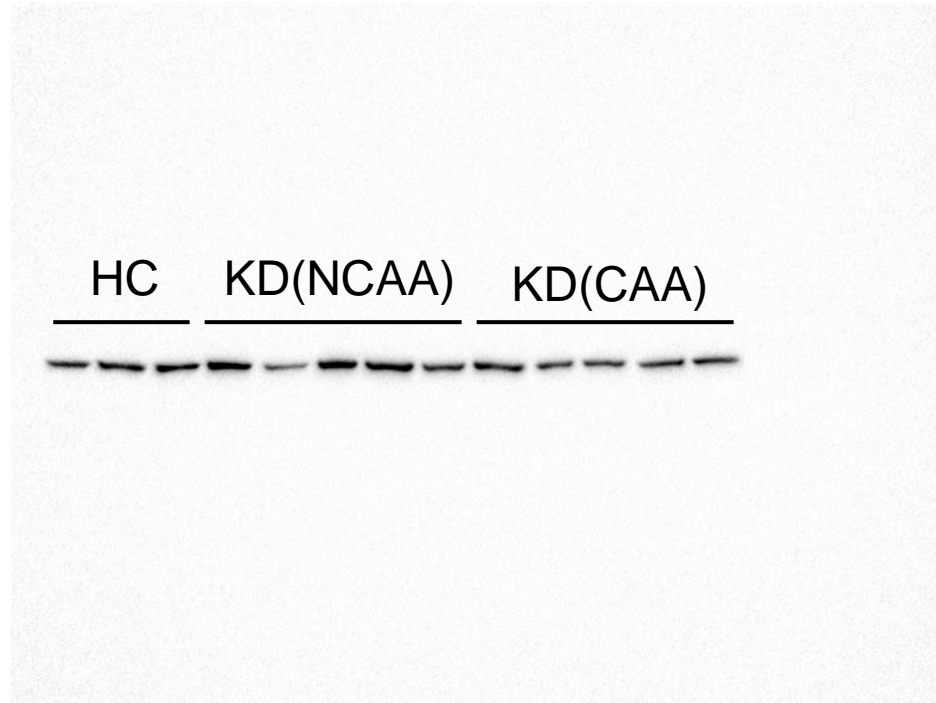

Full unedited gel for Figure5A  
Acquired with ChemiDoc (BioRad)

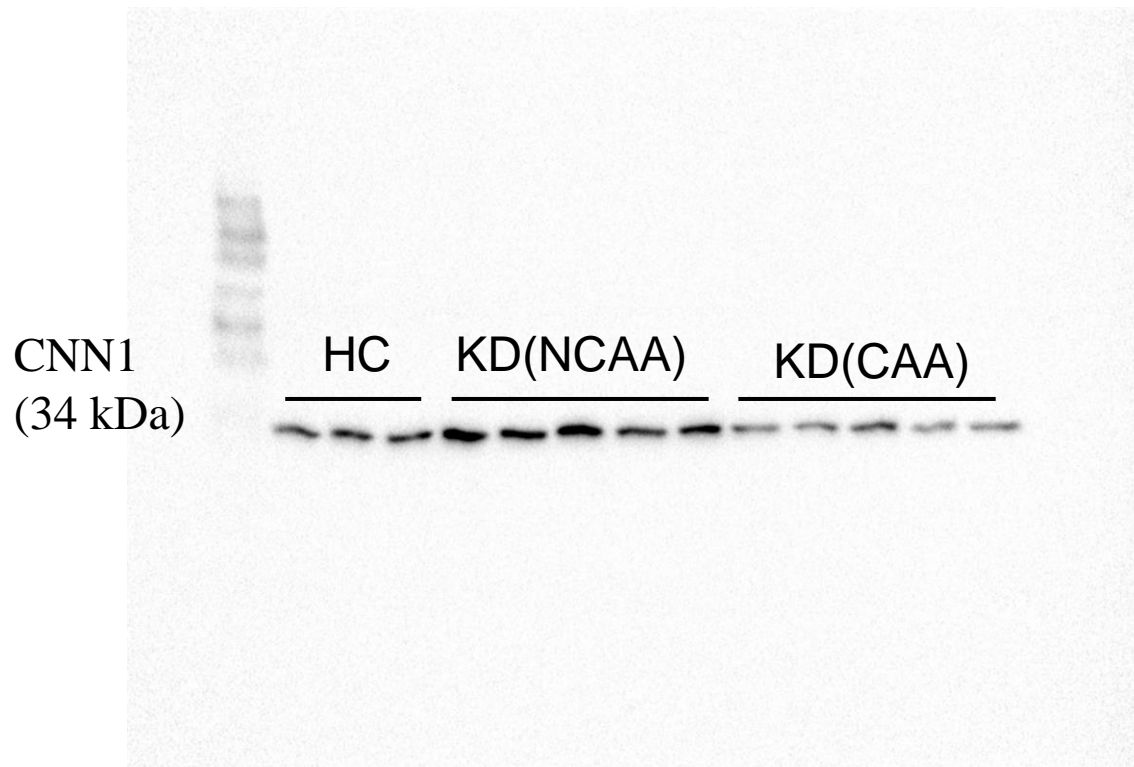

Full unedited gel for Figure5A  
Acquired with ChemiDoc (BioRad)

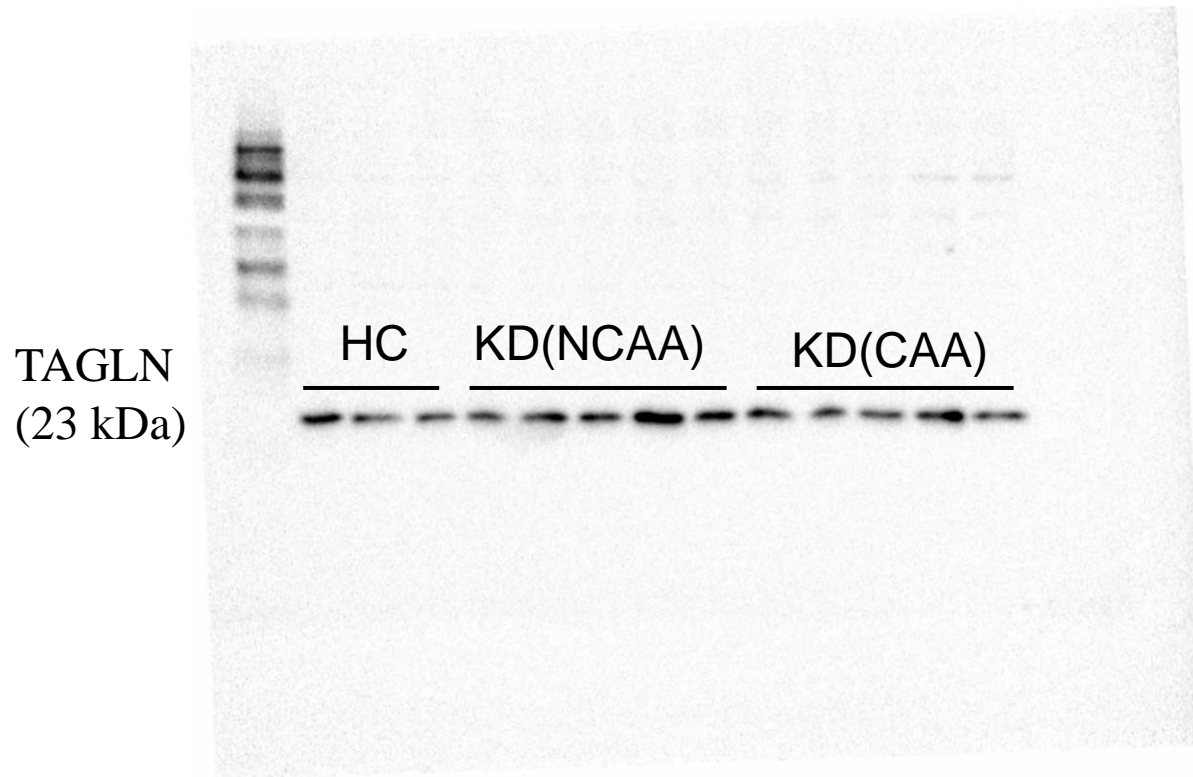

Full unedited gel for Figure5A  
Acquired with ChemiDoc (BioRad)

PCNA  
(29 kDa)

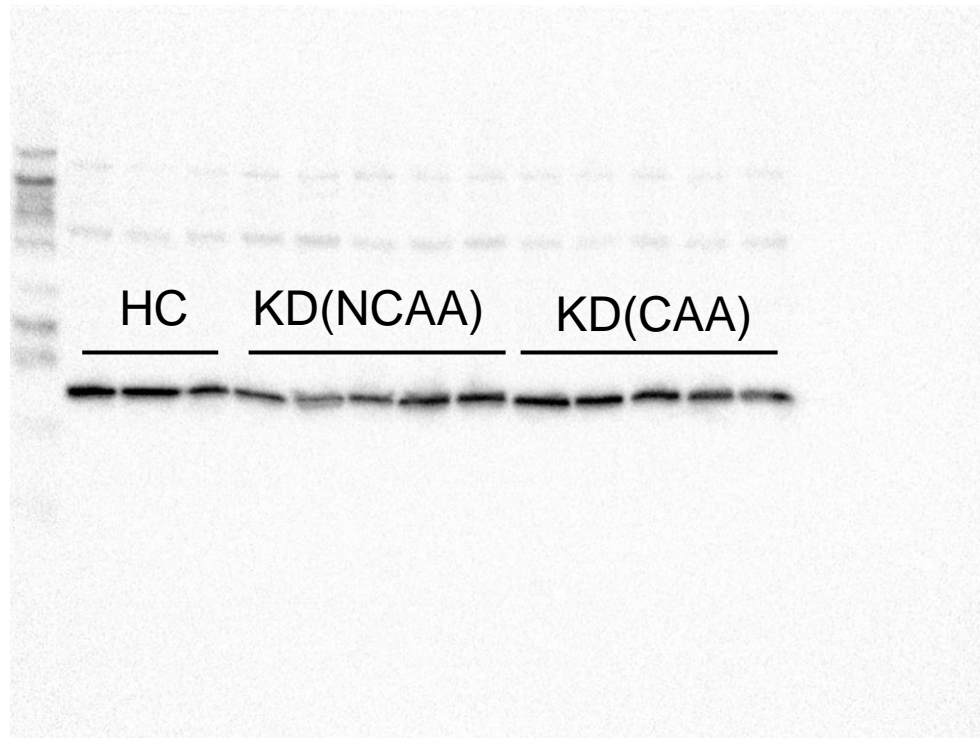

Full unedited gel for Figure5A  
Acquired with ChemiDoc (BioRad)

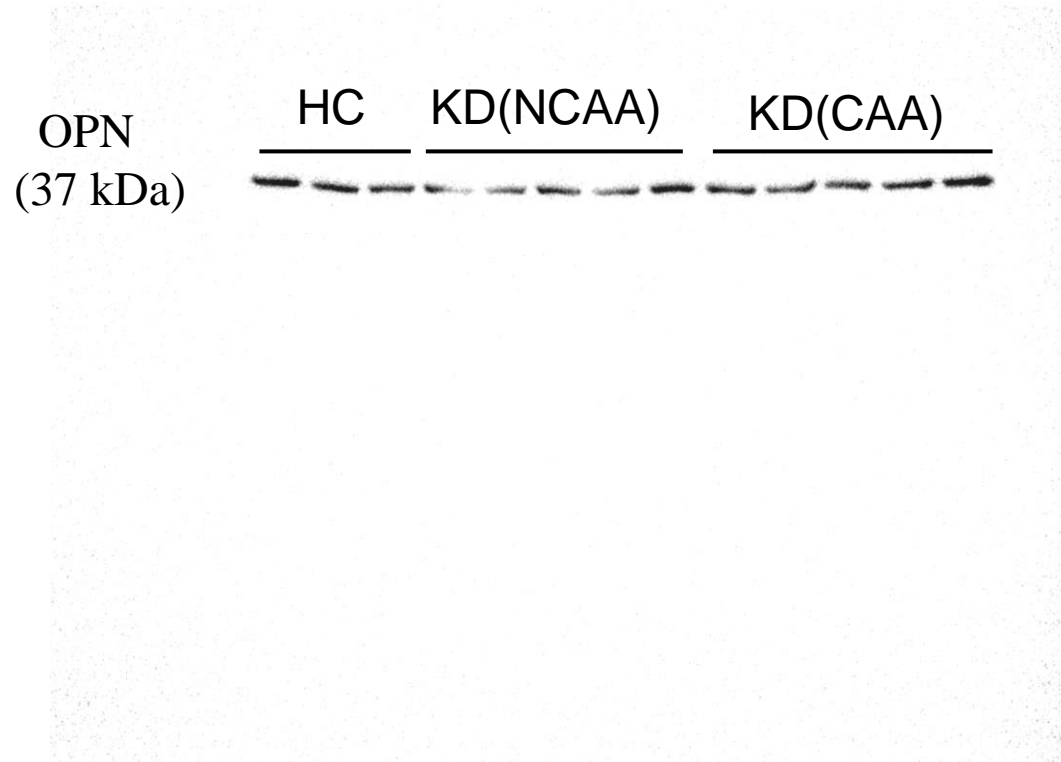

Full unedited gel for Figure5A  
Acquired with ChemiDoc (BioRad)

PDGFR $\beta$   
(124 kDa)

| HC | KD(NCAA) | KD(CAA) |
|----|----------|---------|
|    |          |         |

Full unedited gel for Figure5A  
Acquired with ChemiDoc (BioRad)

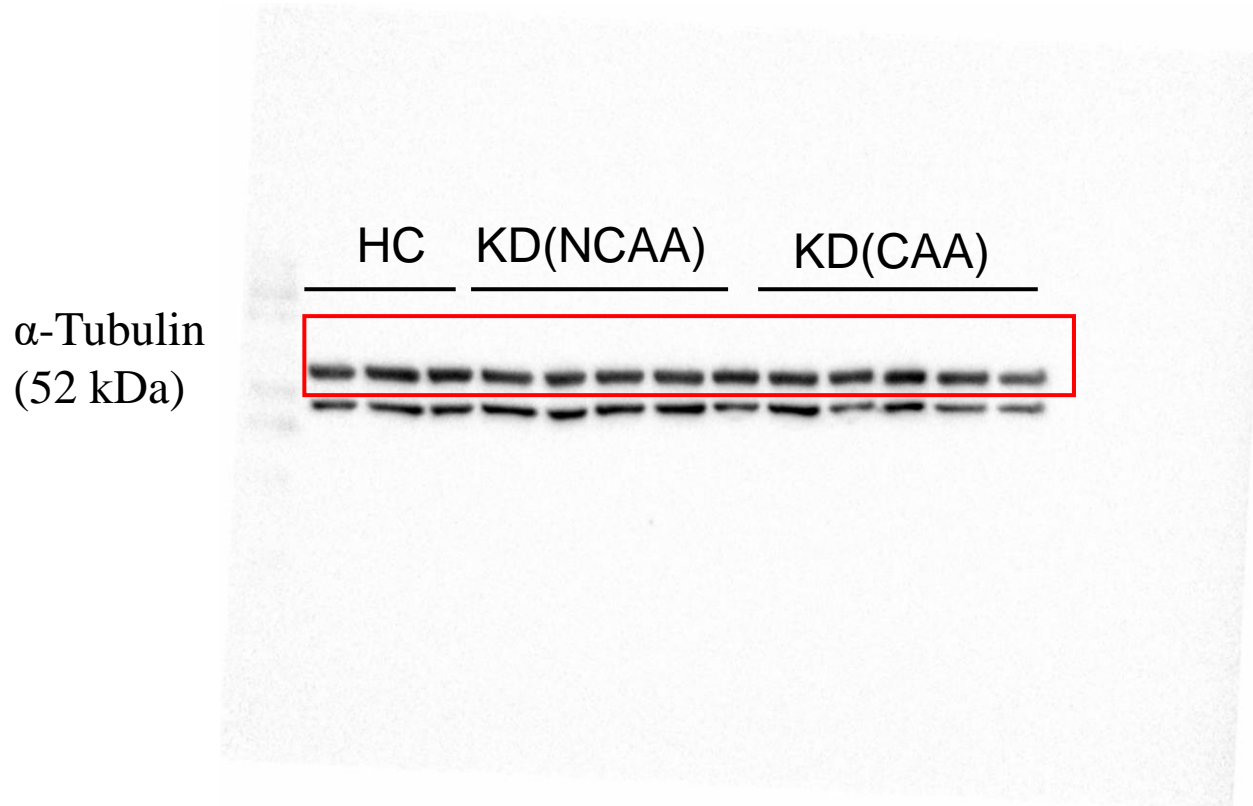

Full unedited gel for Figure5A  
Acquired with ChemiDoc (BioRad)

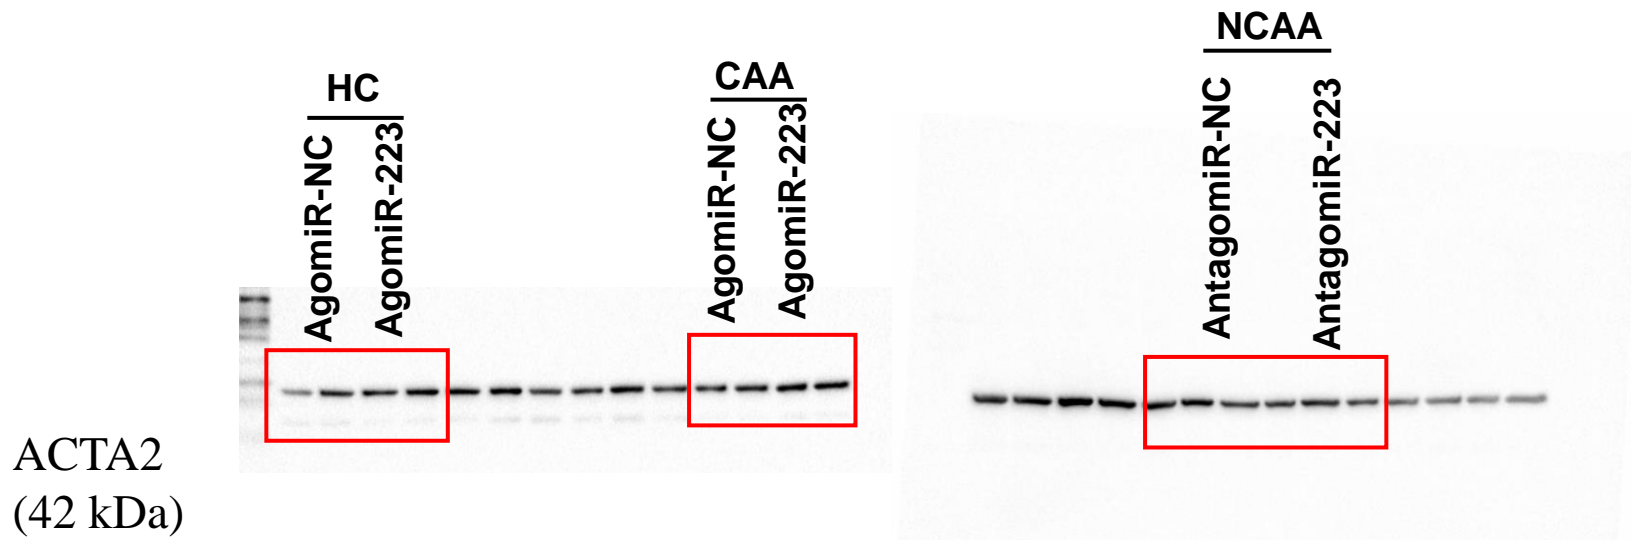

Full unedited gel for Figure5C  
Acquired with ChemiDoc (BioRad)



CNN1  
(34 kDa)

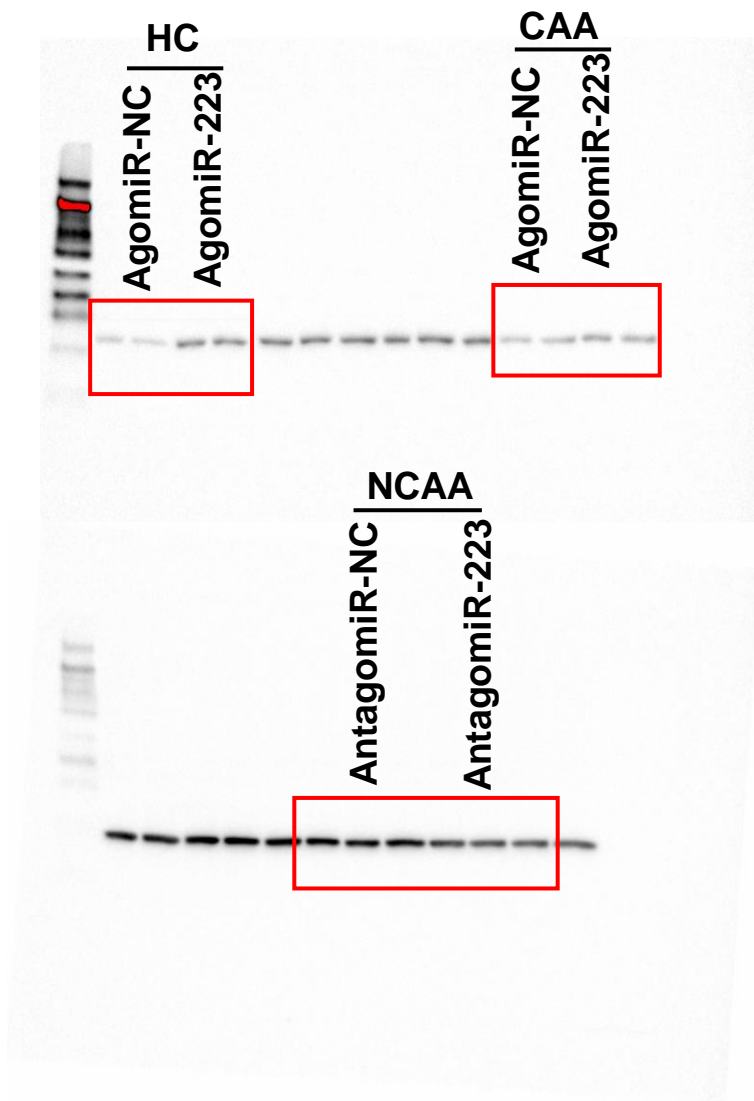

Full unedited gel for Figure5C  
Acquired with ChemiDoc (BioRad)

TAGLN  
(23 kDa)

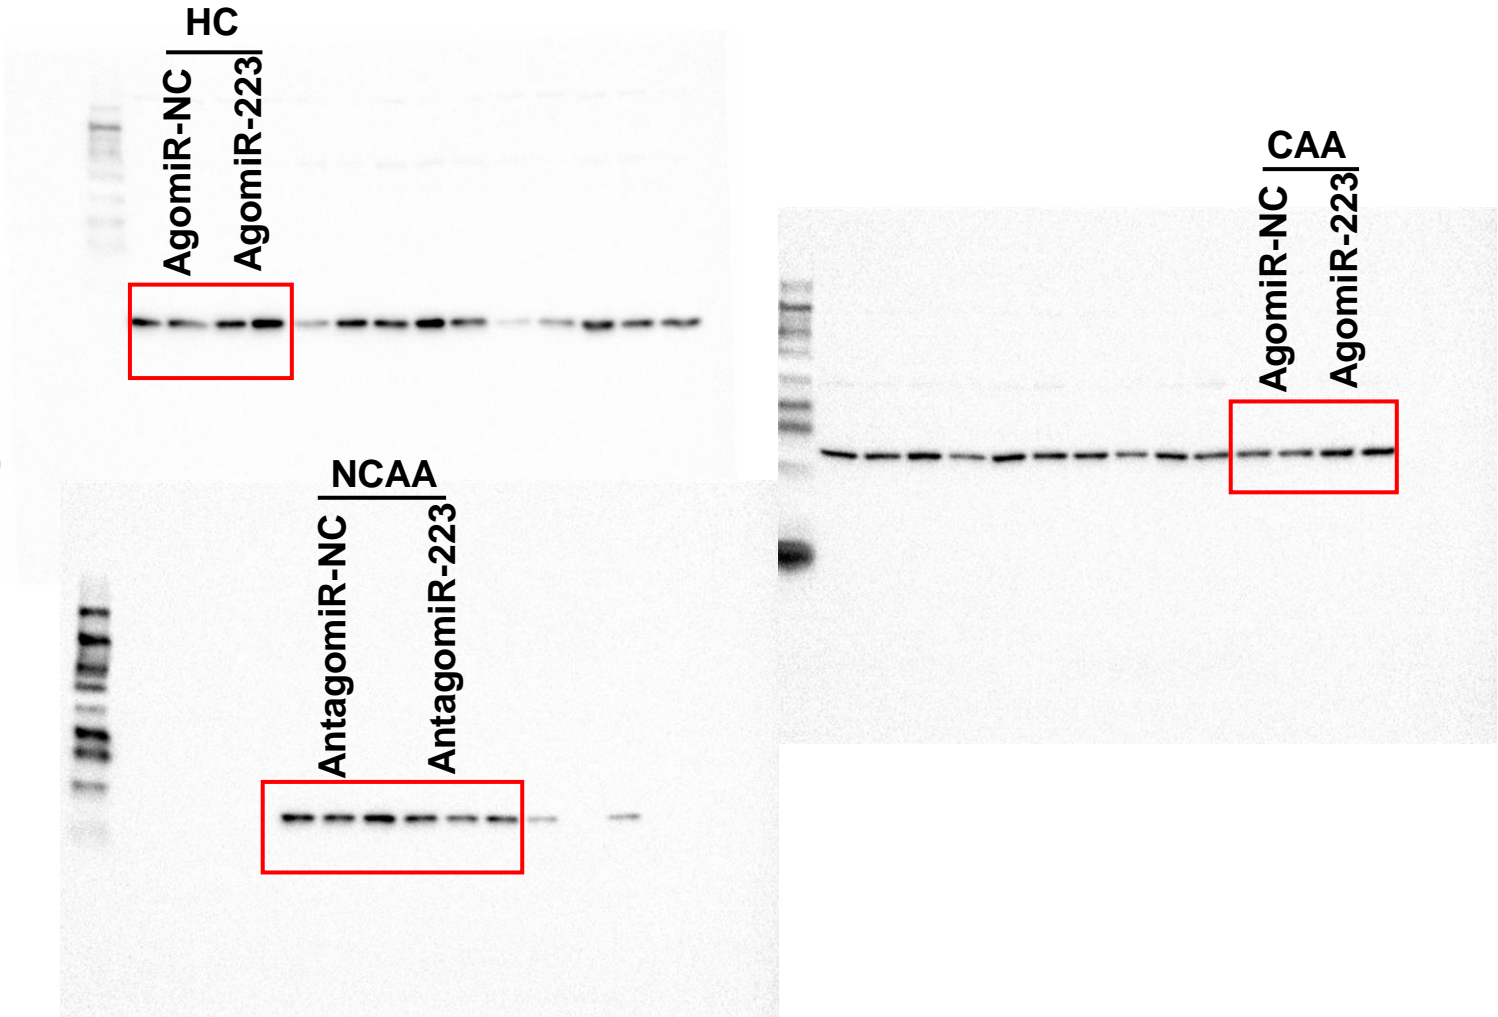

Full unedited gel for Figure5C  
Acquired with ChemiDoc (BioRad)

PCNA  
(29 kDa)

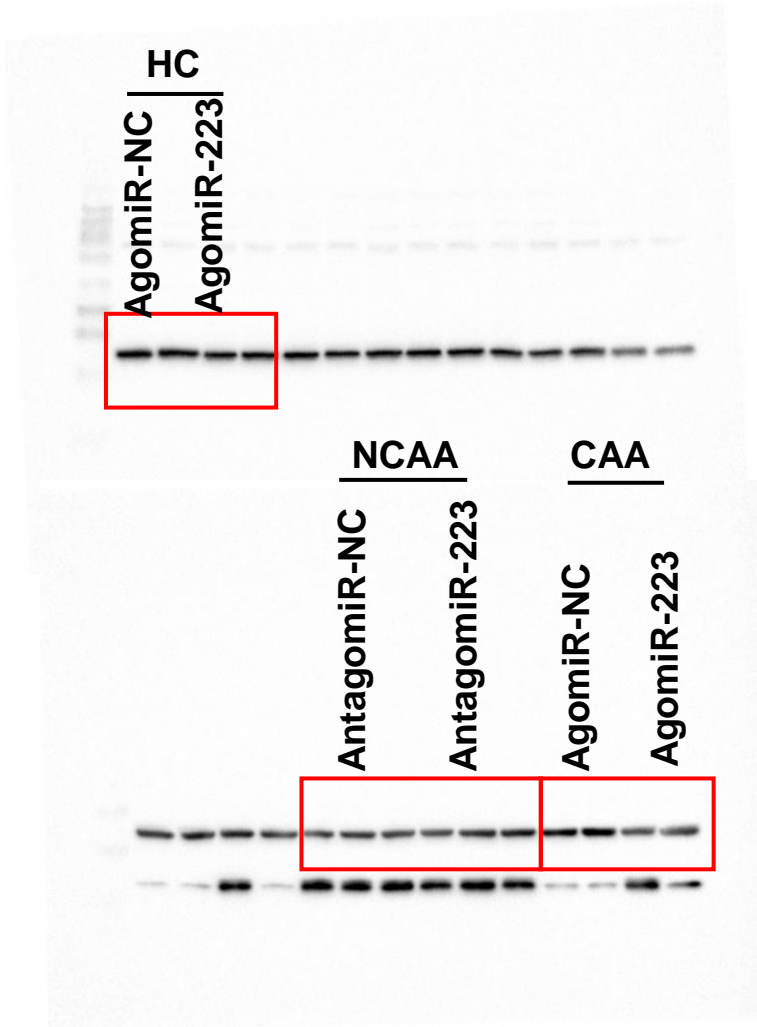

Full unedited gel for Figure5C  
Acquired with ChemiDoc (BioRad)

OPN  
(37 kDa)

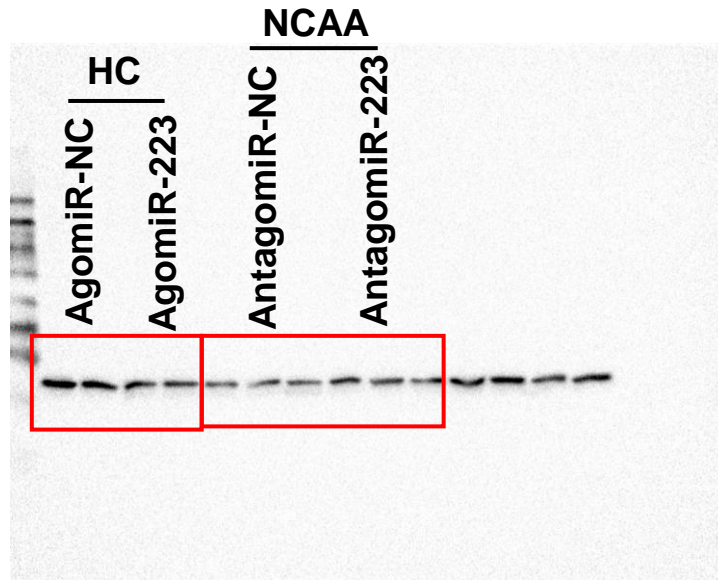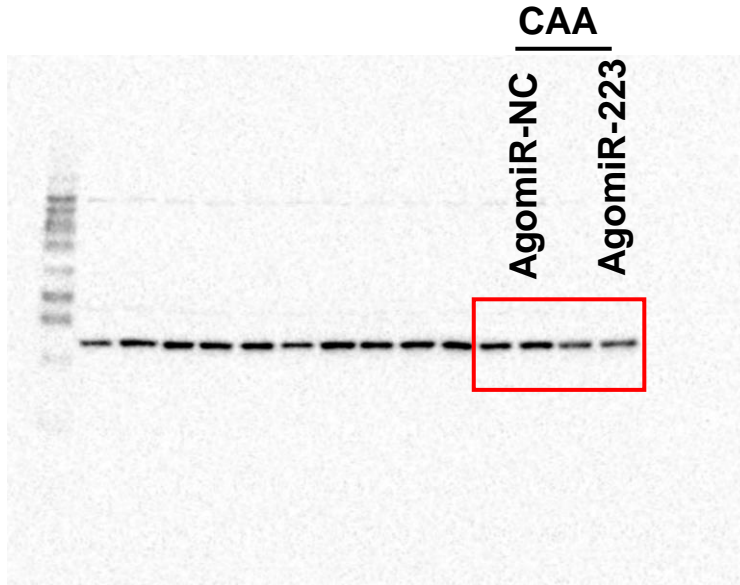

Full unedited gel for Figure5C  
Acquired with ChemiDoc (BioRad)

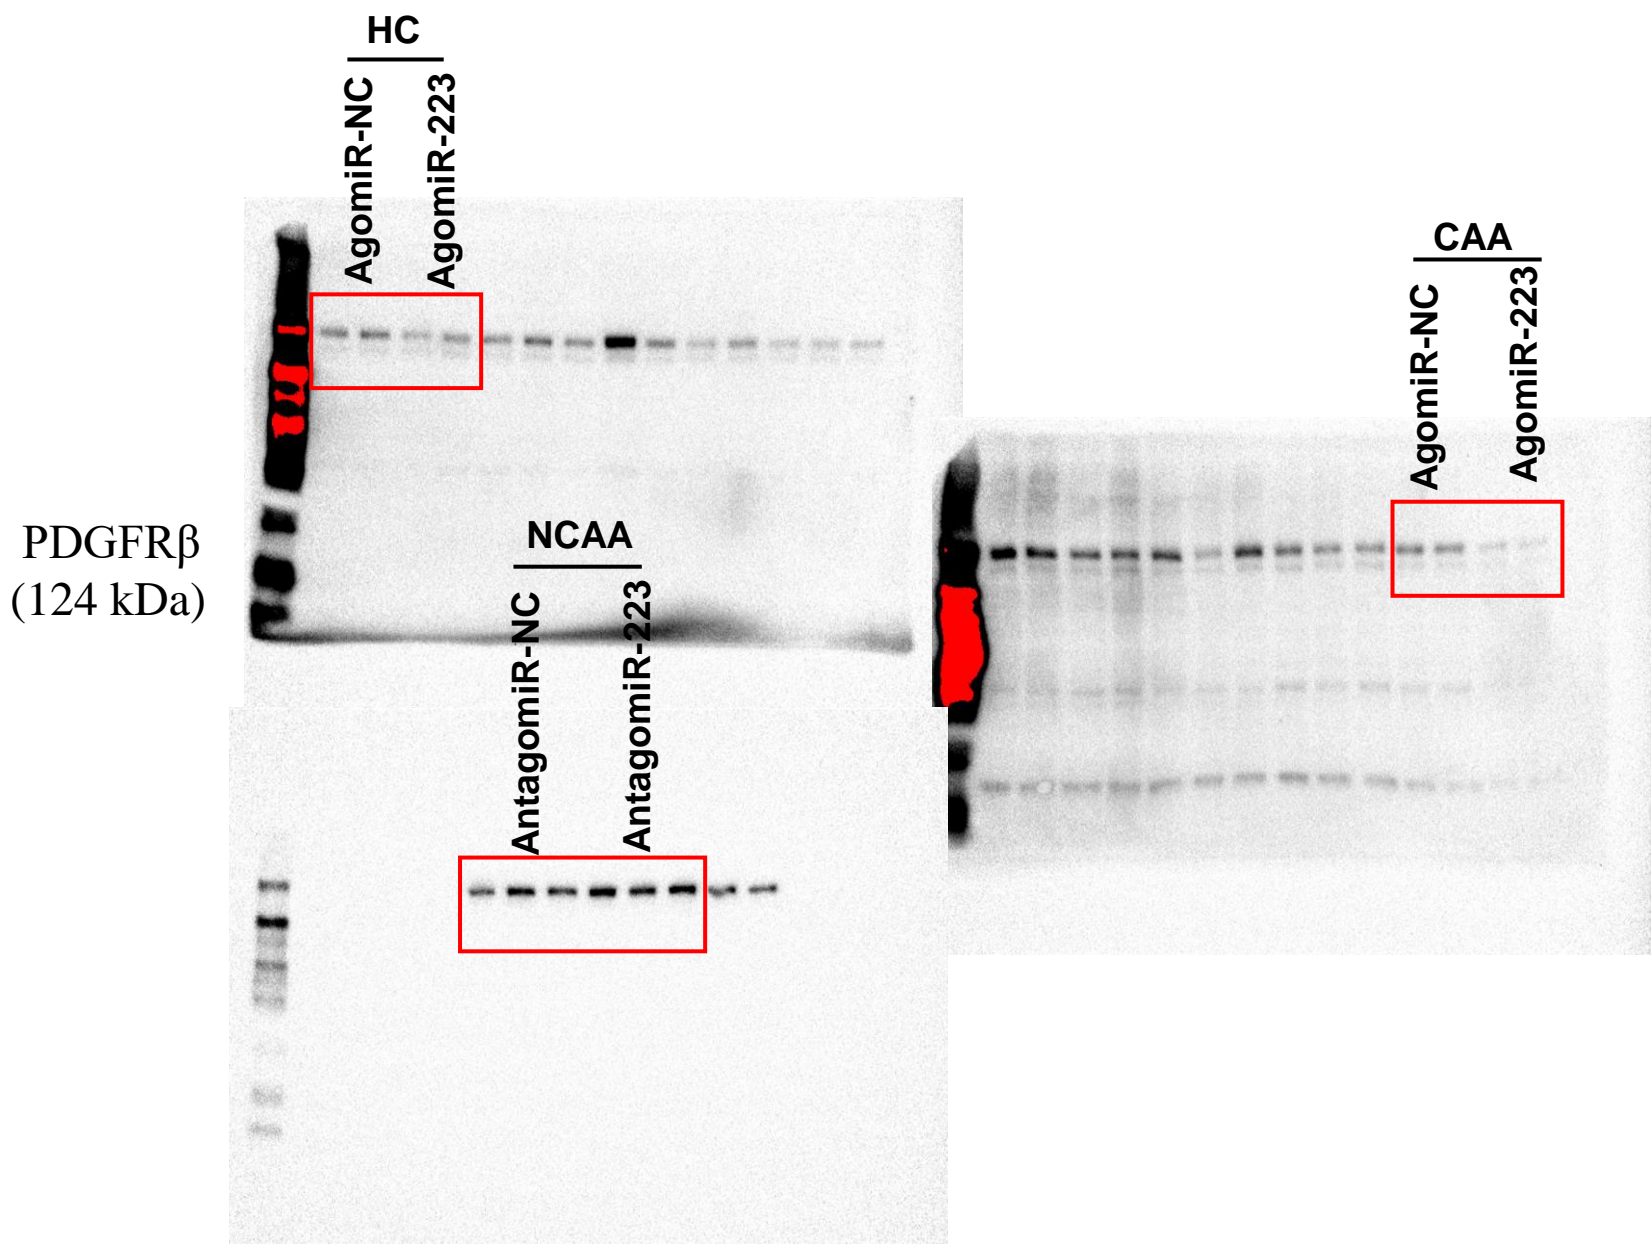

Full unedited gel for Figure5C  
Acquired with ChemiDoc (BioRad)

$\alpha$ -Tubulin  
(52 kDa)

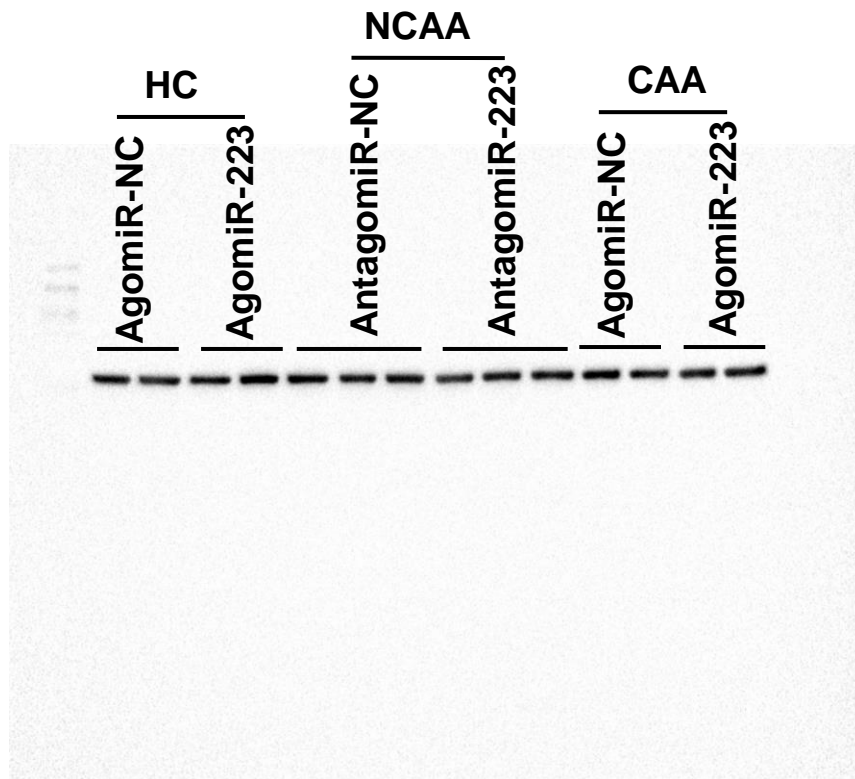

Full unedited gel for Figure5C  
Acquired with ChemiDoc (BioRad)

PCNA  
(29 kDa)

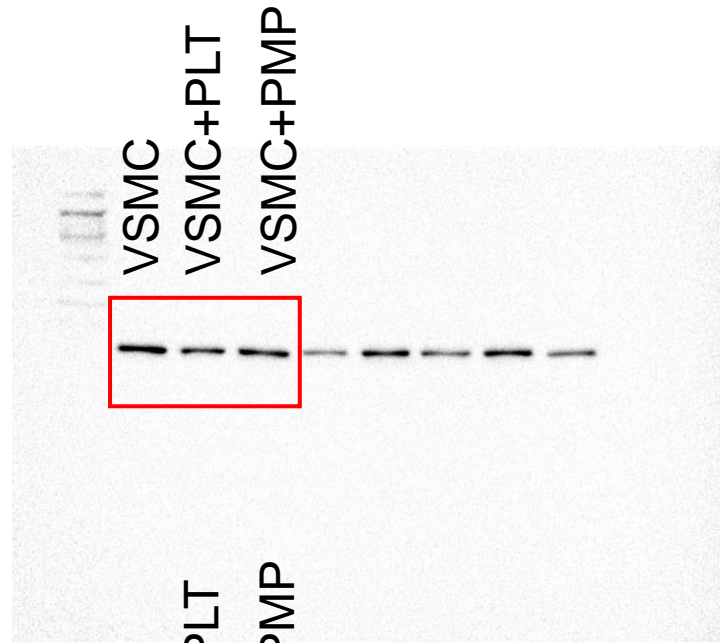

$\alpha$ -Tubulin  
(52 kDa)

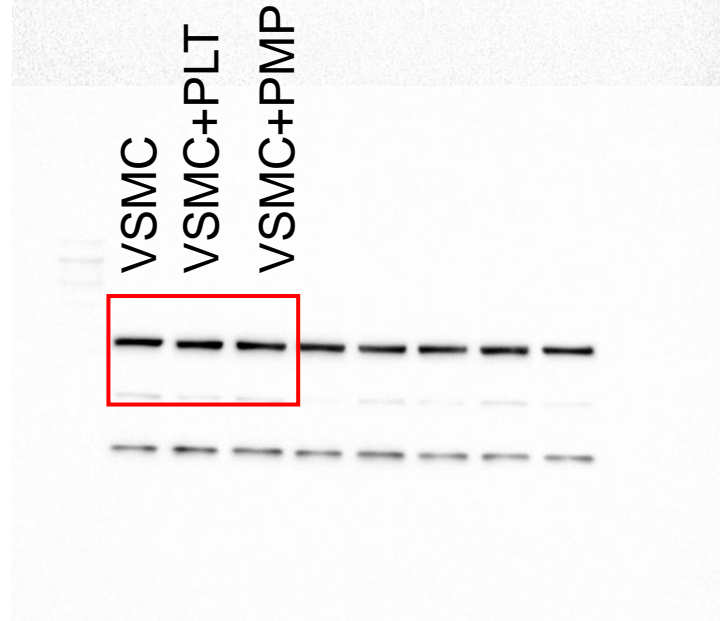

Full unedited gel for Online Figure IV  
Acquired with ChemiDoc (BioRad)

ACTA2  
(42 kDa)

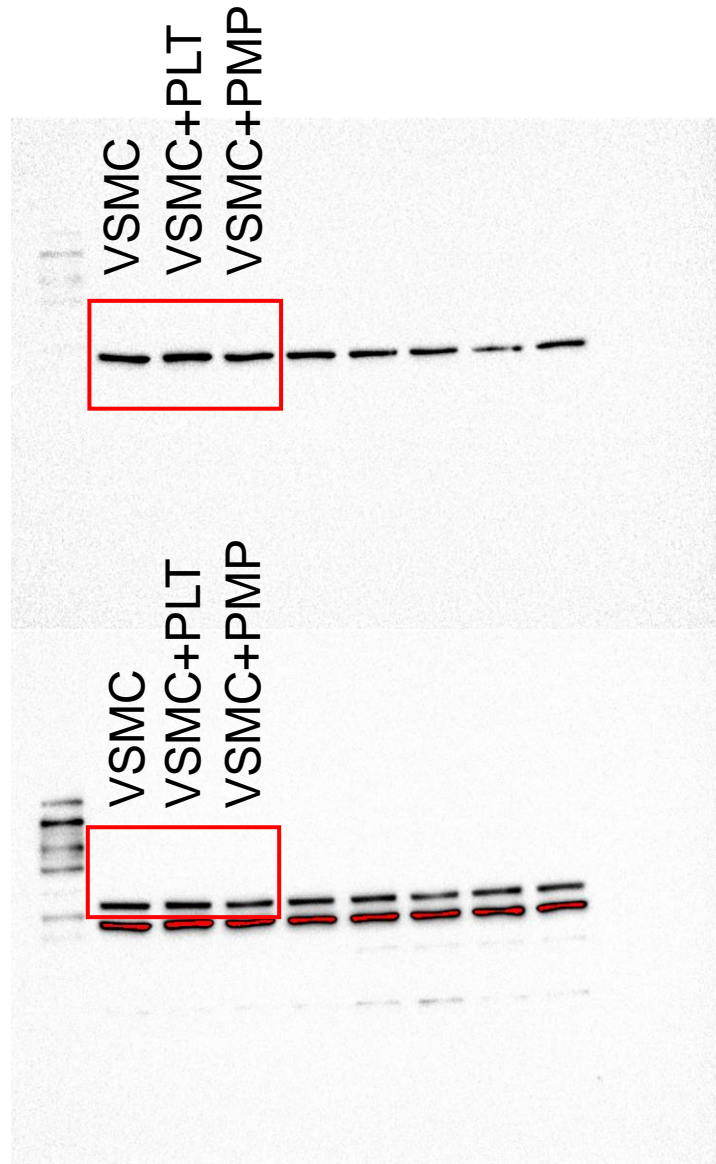

$\alpha$ -Tubulin  
(52 kDa)

Full unedited gel for Online Figure IV  
Acquired with ChemiDoc (BioRad)



ACTA2  
(42 kDa)

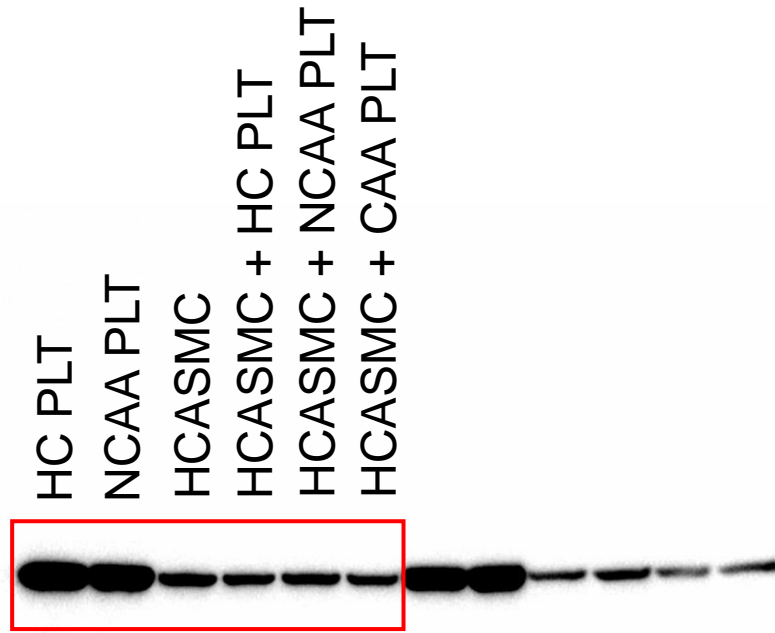

Full unedited gel for Online Figure IX  
Acquired with ChemiDoc (BioRad)

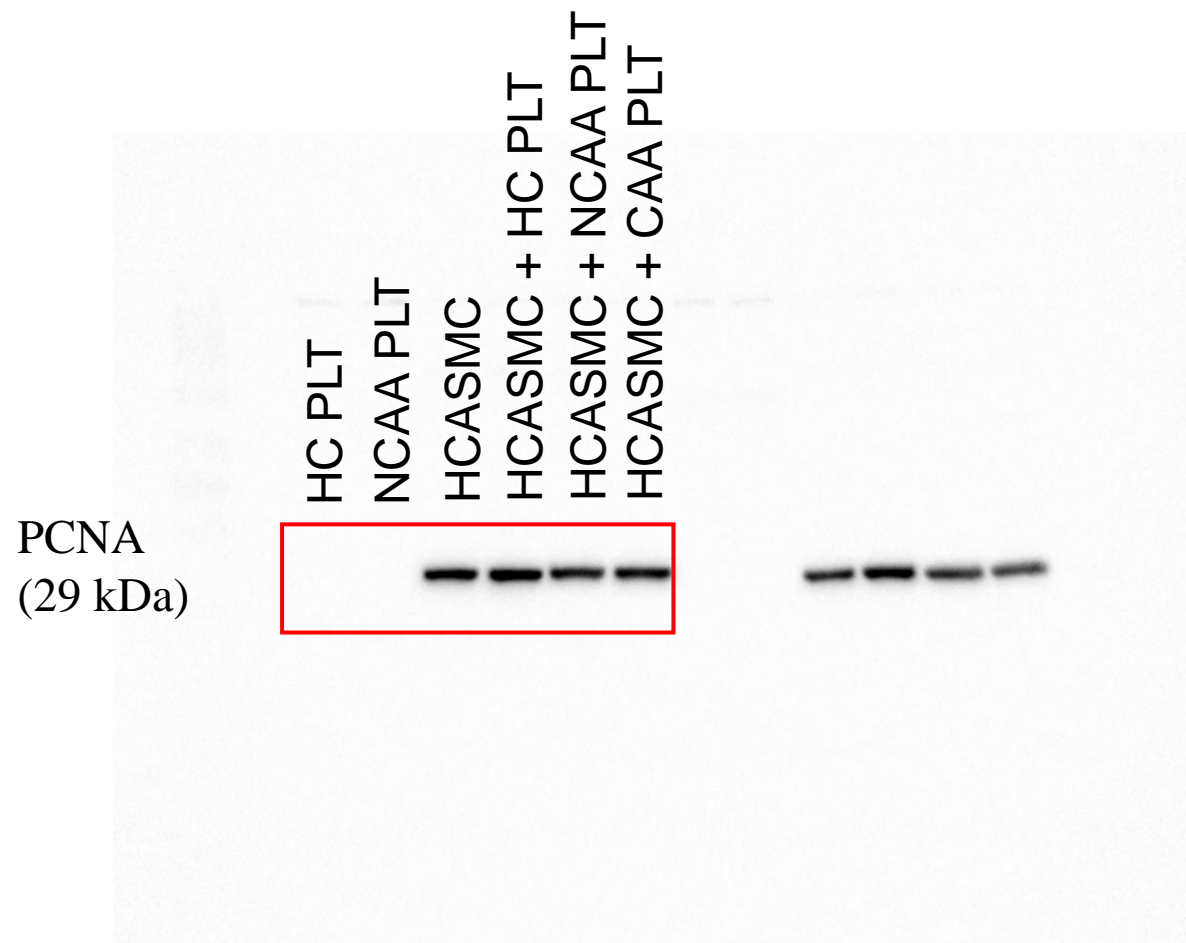

Full unedited gel for Online Figure IX  
Acquired with ChemiDoc (BioRad)

PDGFR $\beta$   
(124 kDa)

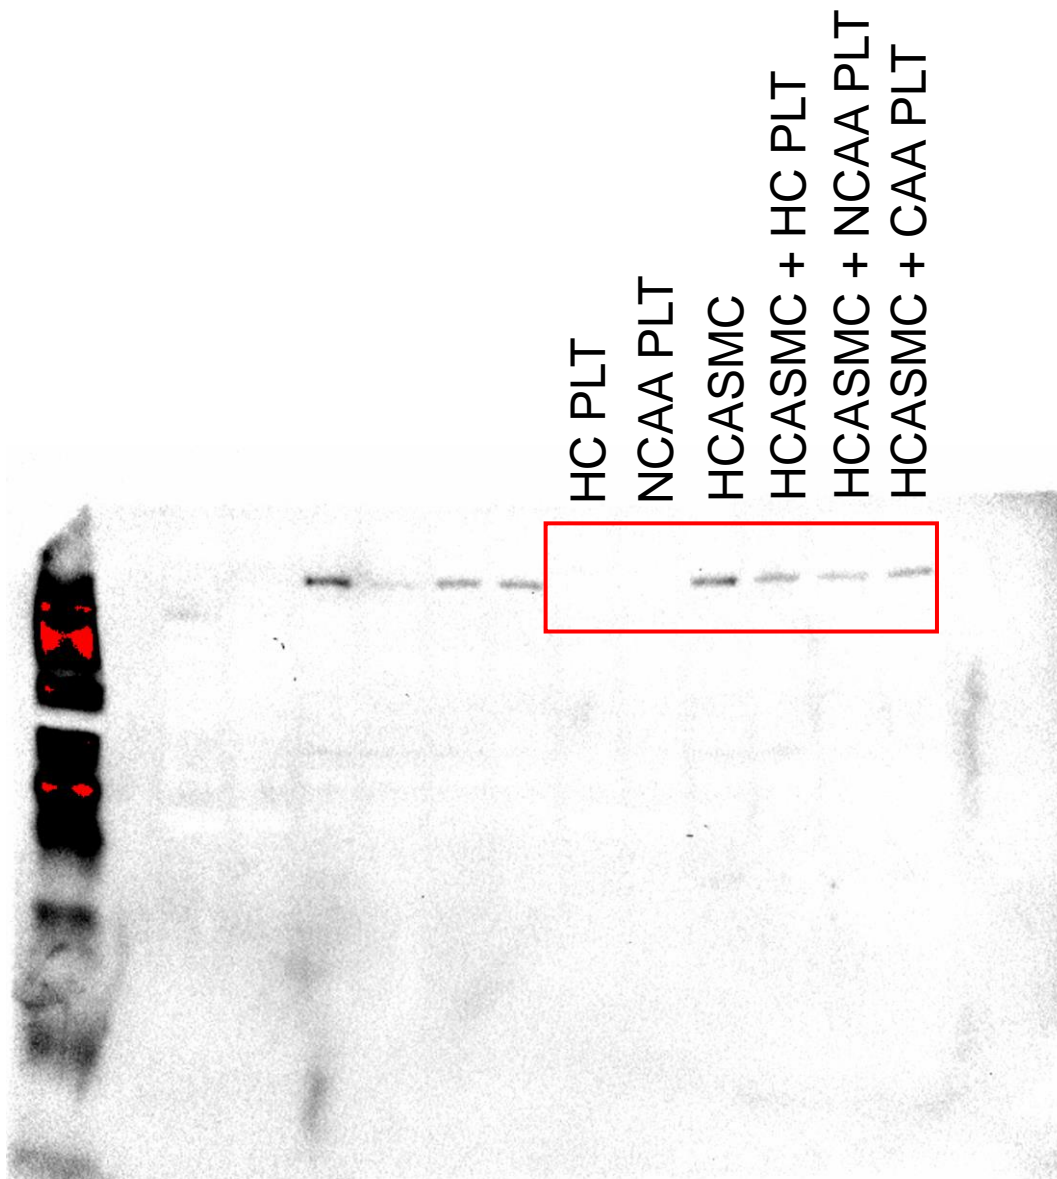

Full unedited gel for Online Figure IX  
Acquired with ChemiDoc (BioRad)

CNN1  
(34 kDa)

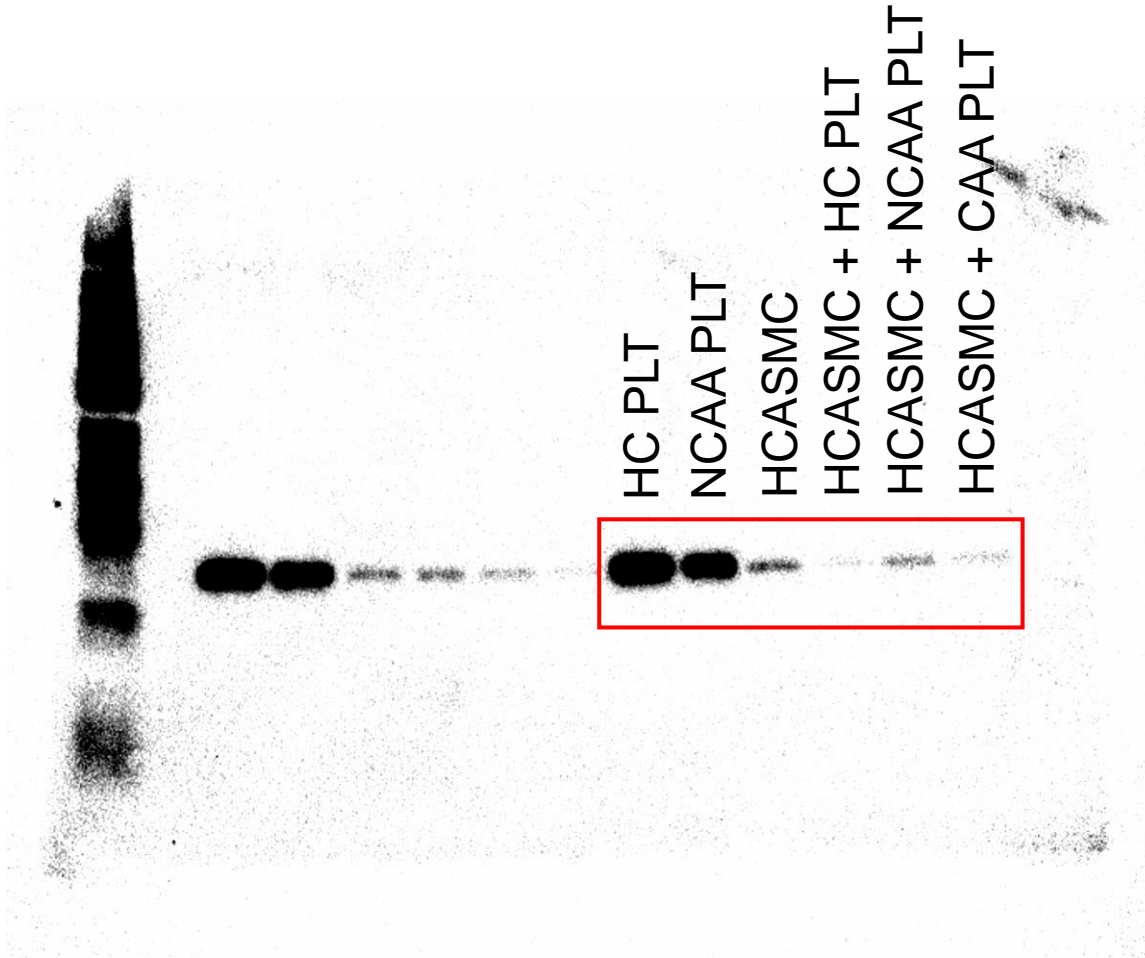

Full unedited gel for Online Figure IX  
Acquired with ChemiDoc (BioRad)

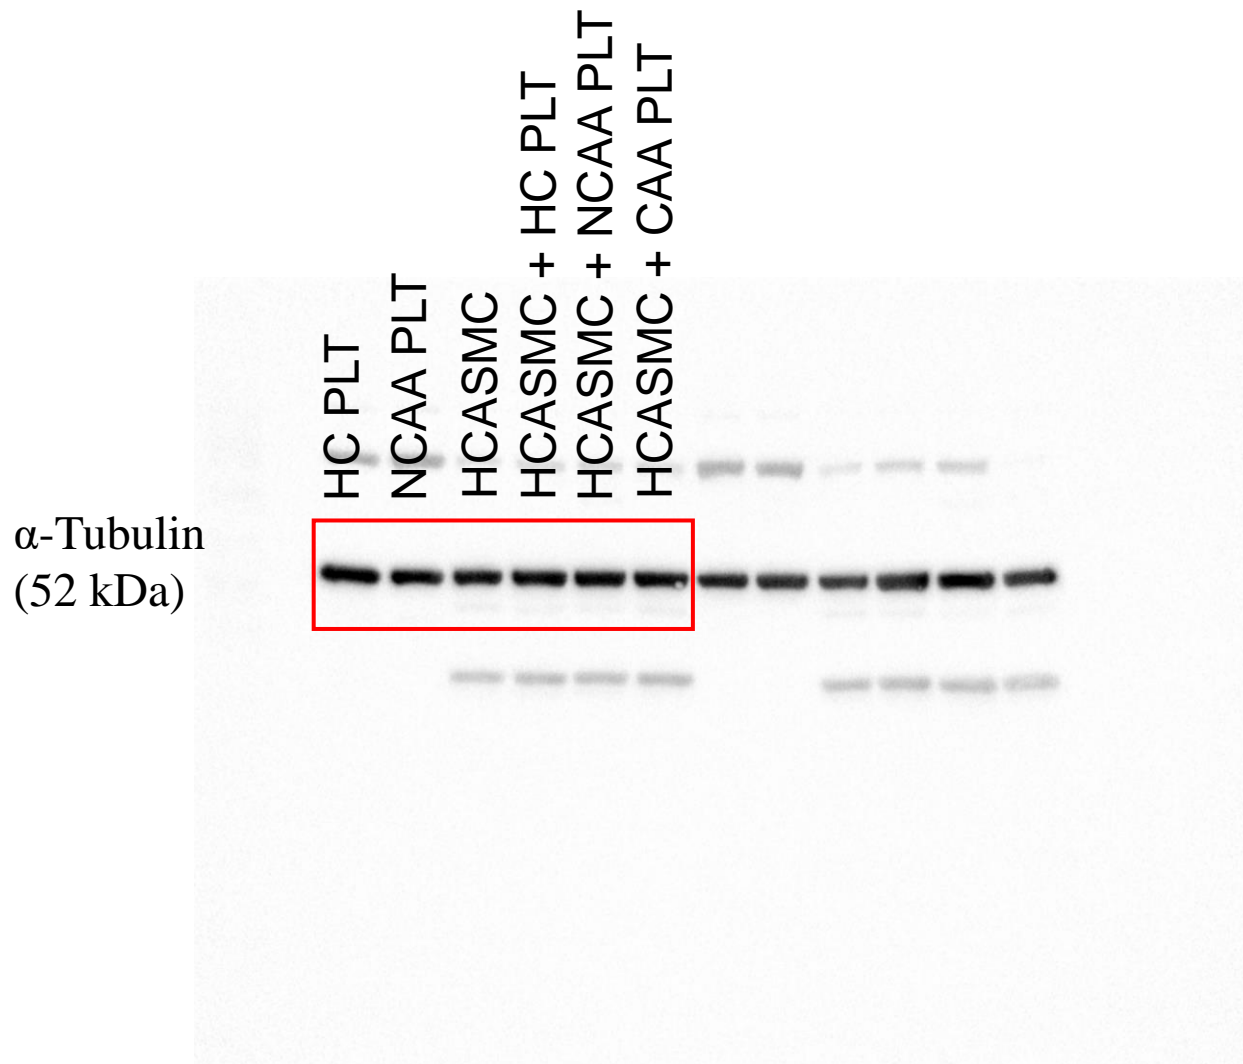

Full unedited gel for Online Figure IX  
Acquired with ChemiDoc (BioRad)

PDGFR $\beta$   
(124 kDa)

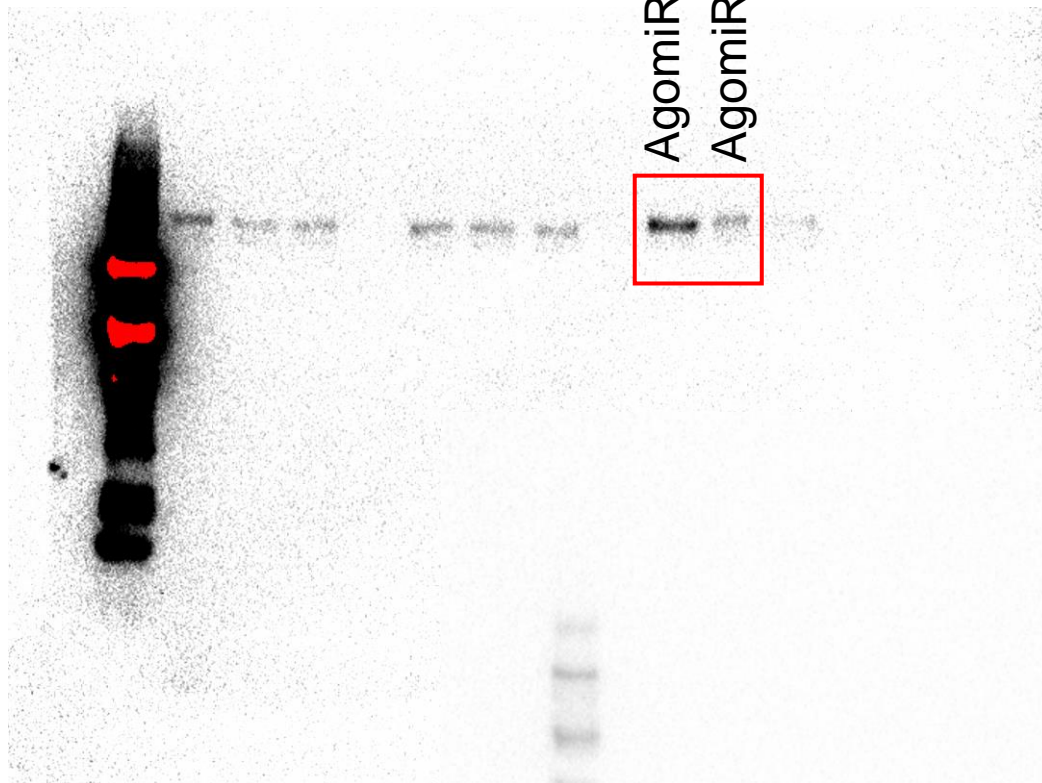

AgomiR-NC  
AgomiR-223

$\alpha$ -Tubulin  
(52 kDa)

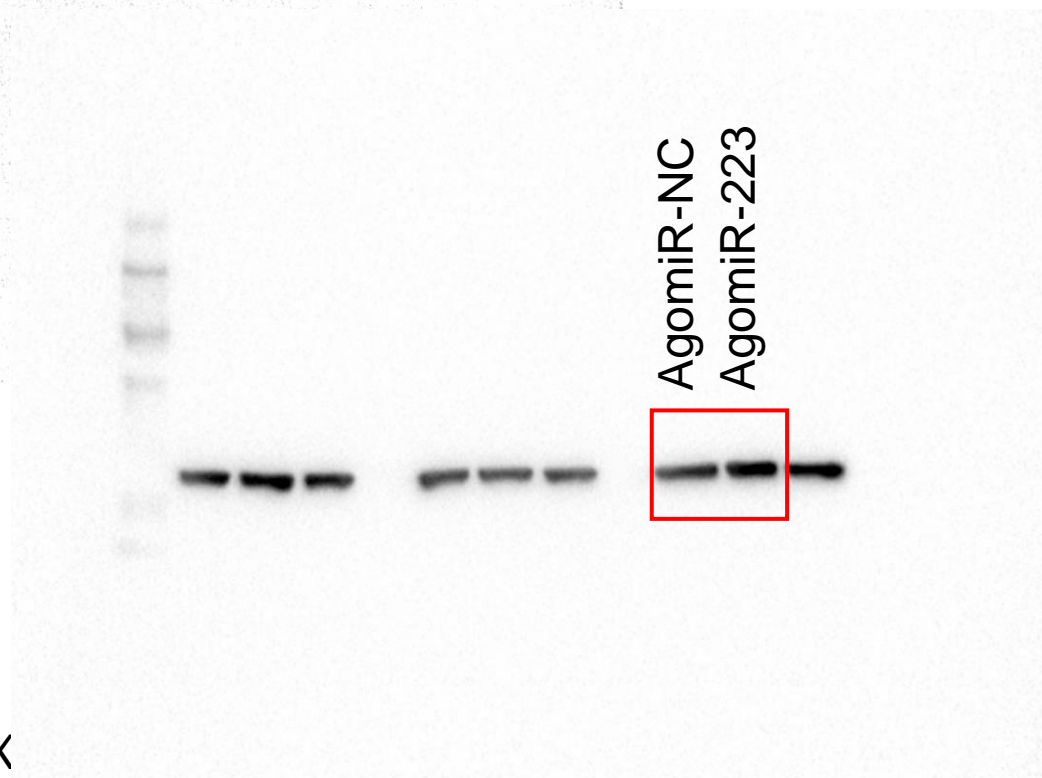

AgomiR-NC  
AgomiR-223

Full unedited gel for Online Figure X  
Acquired with ChemiDoc (BioRad)
